# Supplementary material
Source: PubMed Central journal article supplement (PMC3048704)

## Supplemental data

### **Residues 155 and 348 contribute to determination of P2X<sub>7</sub> receptor function via distinct mechanisms revealed by single nucleotide polymorphisms**

Helen J Bradley, Jocelyn M Baldwin\*, G Ranjan Goli\*, Brian Johnson, Jie Zou, Asipu Sivaprasadarao, Stephen A Baldwin, and Lin-Hua Jiang<sup>†</sup>

From Institute of Membrane and Systems Biology, Faculty of Biological Sciences, University of Leeds, Leeds LS2 9JT, United Kingdom

\*These two authors contributed equally.

<sup>†</sup>Correspondence: Dr Lin-Hua Jiang at the above address. Email: [l.h.jiang@leeds.ac.uk](mailto:l.h.jiang@leeds.ac.uk)

Short title: Expression and function of P2X<sub>7</sub> receptors

#### **Fig.S1 Effects of Y155H and T348A mutations on ATP-induced currents mediated by the rP2X<sub>7</sub> receptor**

A. Representative ATP-induced current densities in cells expressing the rP2X<sub>7</sub> WT, Y155H or T348A mutant receptors in normal extracellular solution. The dotted line denotes the maximal current for the WT rP2X<sub>7</sub> receptor. B. ATP concentration-current density curves from recordings shown in A. The smooth lines represent the best fits to the Hill equation. C. Mean maximal current density in parallel experiments. The cell number in each case is indicated. \*\*\*,  $p < 0.001$ , the maximal current density compared to WT receptor (*t*-test).

#### **Fig.S2 Effects of reciprocal mutations of residues 155 and 348 on BzATP-induced currents mediated by the human and rat P2X<sub>7</sub> receptors**

A. Representative BzATP-induced current densities in cells expressing the hP2X<sub>7</sub> WT, H155Y or A348T mutant receptors in low divalent cation extracellular solution (top), and BzATP concentration-current density curves (bottom). B. Representative BzATP-induced current densities in cells expressing the rP2X<sub>7</sub> WT, Y155H or T348A mutant receptors in low divalent cation extracellular solution (top), and BzATP concentration-current density curves (bottom). In these experiments, the normal extracellular solution was used to wash off BzATP, and then extracellular was returned to the low divalent cation solution, before applications of the following concentrations of BzATP. The dotted line denotes the currents for the WT P2X<sub>7</sub> receptors. The smooth lines represent the best fits to the Hill equation. The cell number in each case is indicated in brackets. \*\*\*,  $p < 0.001$ , \*\*,  $p < 0.01$ , \*,  $p < 0.05$ , the maximal current density compared to the WT receptors (*t*-test).

#### **Fig.S3 Representative ATP-induced current densities in cells expressing hP2X<sub>7</sub> mutant receptors**

Mutations were introduced into positions surrounding residue 155 (A-B) and residue 348 (C). The dotted line denotes the maximal current for the WT hP2X<sub>7</sub> receptor.

#### **Fig.S4 Effect of mutation of residues at position 155 on cell surface and total expression level of hP2X<sub>7</sub> receptors**

Representative Western blots showing biotin-labelling or surface expression of the indicated WT and mutant hP2X<sub>7</sub> receptors (top), and total protein expression for P2X<sub>7</sub> receptor and GFP in whole cell lysate (bottom). -ve denotes the cells that were transfected with the empty vector.

**Fig.S5 Inhibition of hP2X<sub>7</sub> WT and H155Y mutant receptors by antagonist KN-62**

ATP concentration-current density curves before (control) and after 4 min exposure to 100 nM KN-62 for the hP2X<sub>7</sub> WT (A) and H155Y mutant receptors (B) (n = 6 for each case). The dotted line denotes the currents for the receptors before applications of KN-62.

**Fig.6S Location of intracellular hP2X<sub>7</sub> proteins and GFP-LAMP1**

Representative confocal images of HEK293 cells co-expressing hP2X<sub>7</sub> WT receptor (red) and GFP-tagged LAMP1 (green), a protein located to the late endocytic organelles. Scale bar is 10  $\mu$ m.

# Supplemental Fig.1

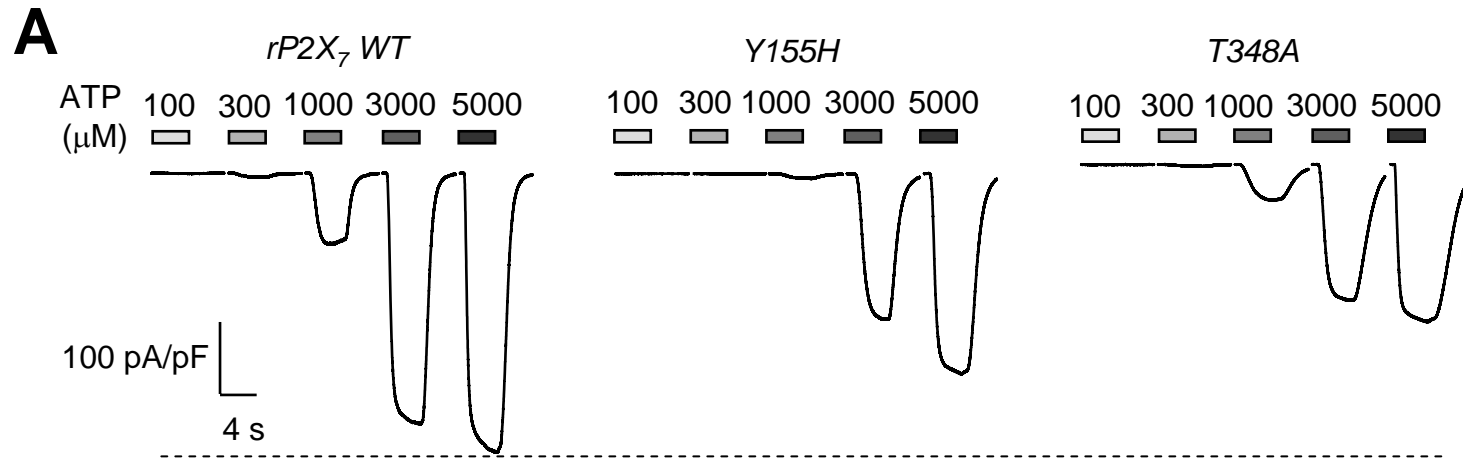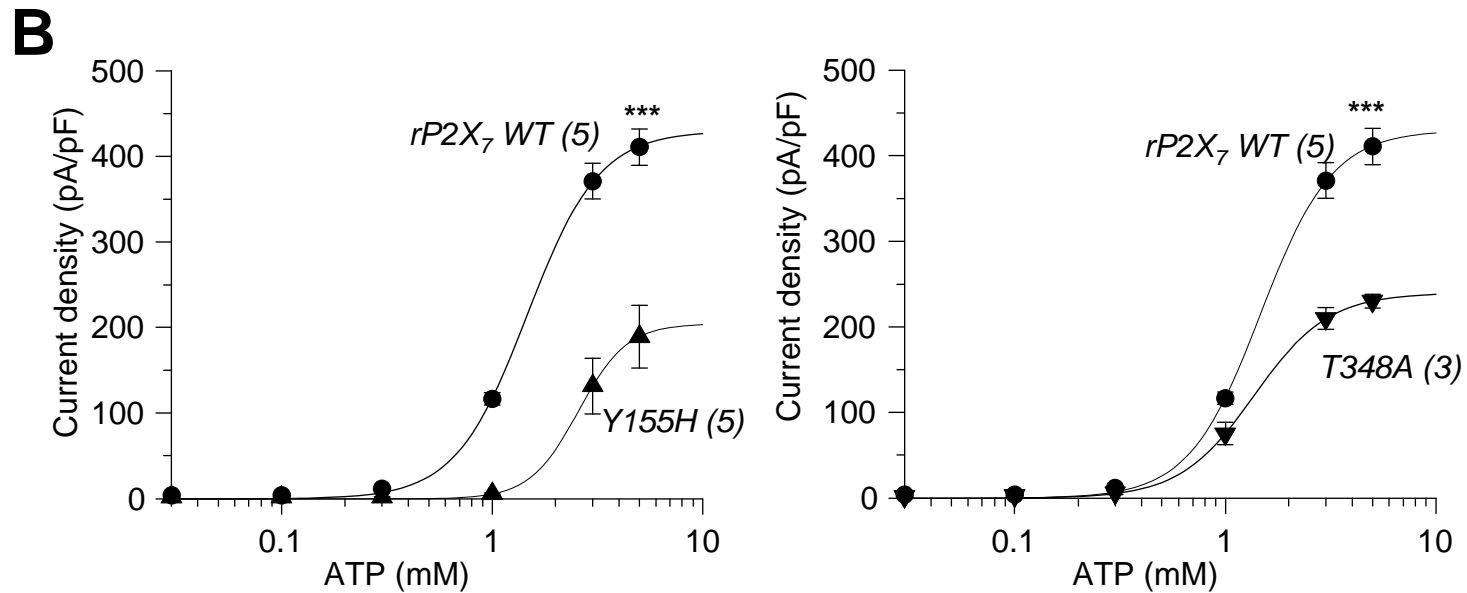

# Supplemental Fig.2A

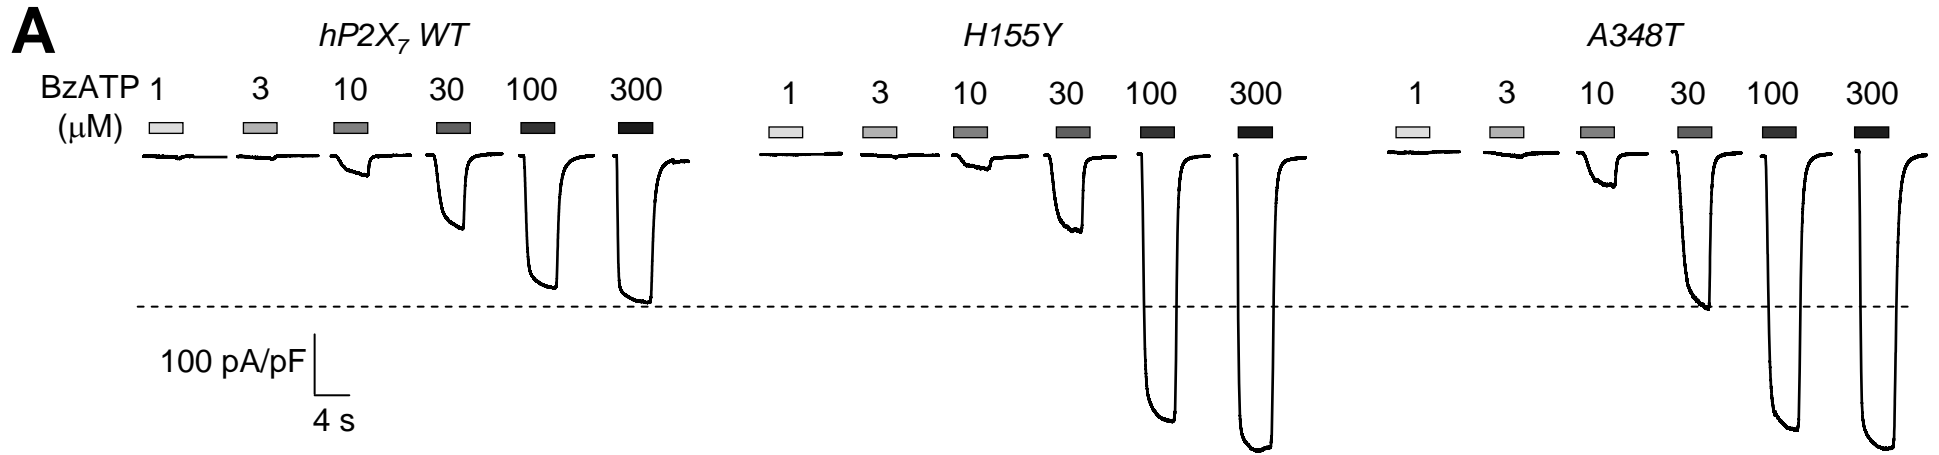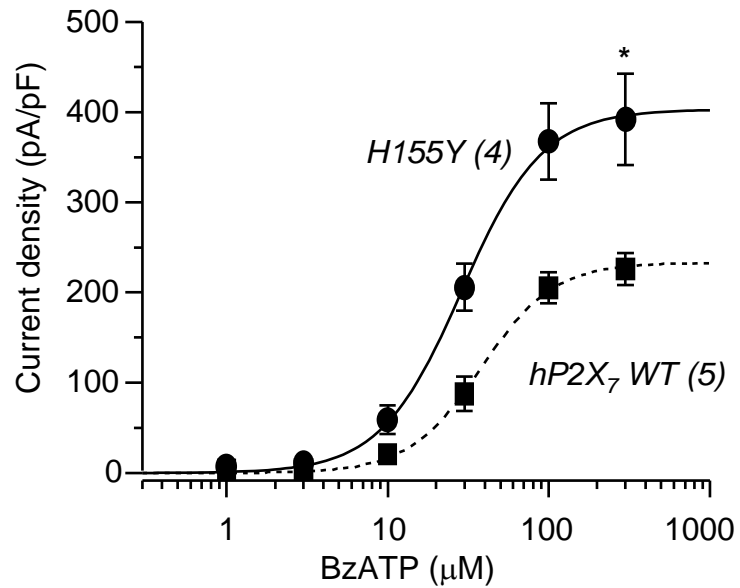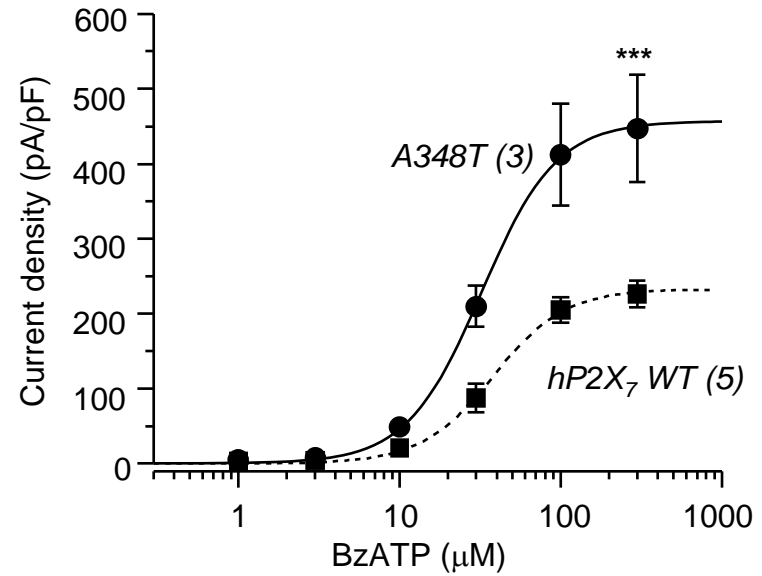

# Supplemental Fig.2B

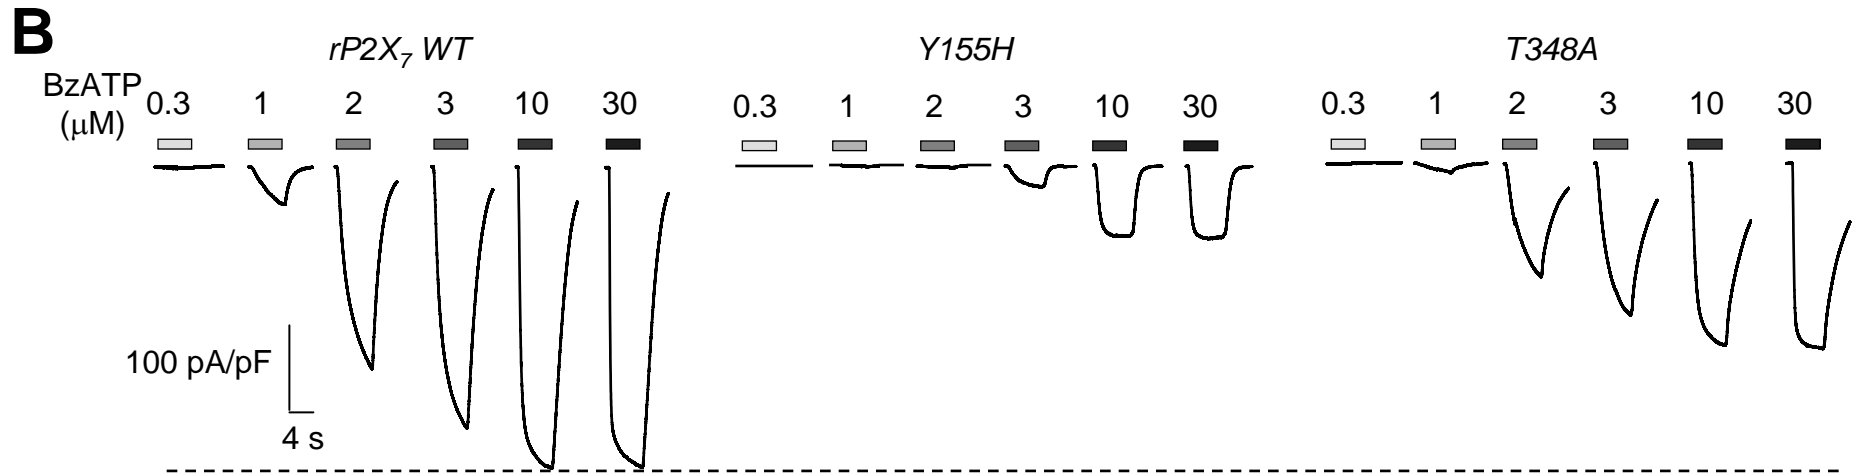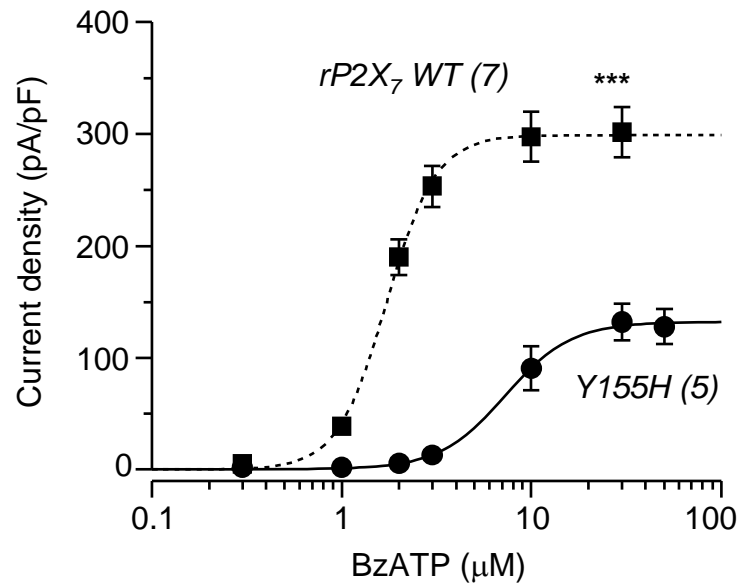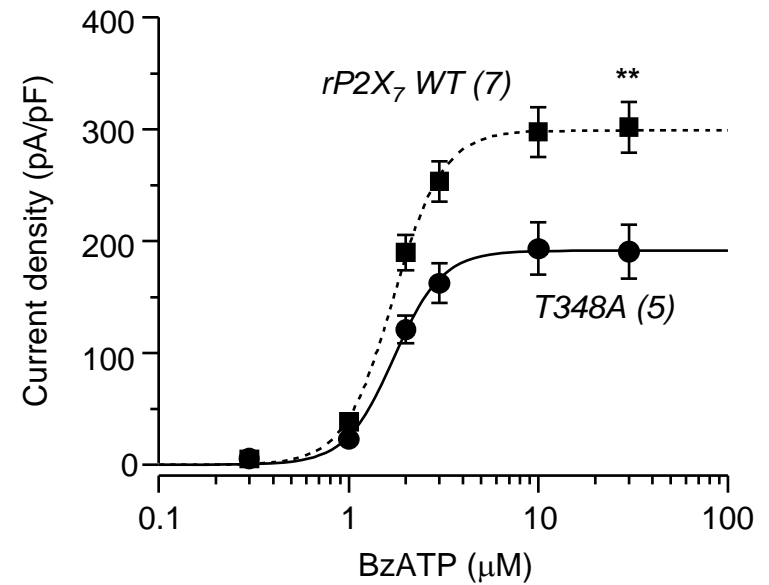

# Supplemental Fig.3A-B

## A

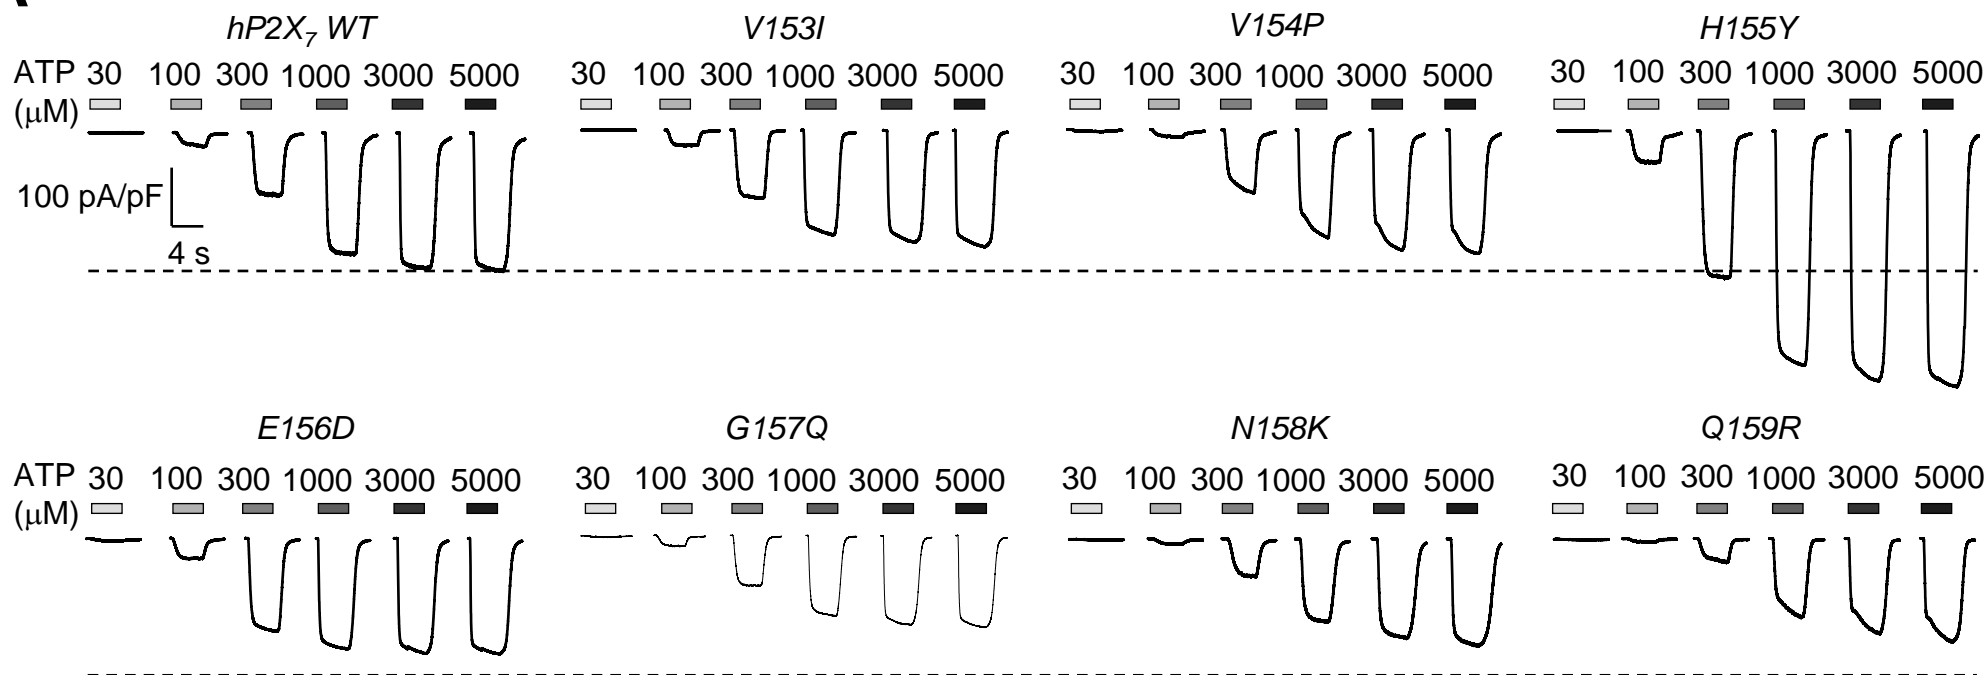

## B

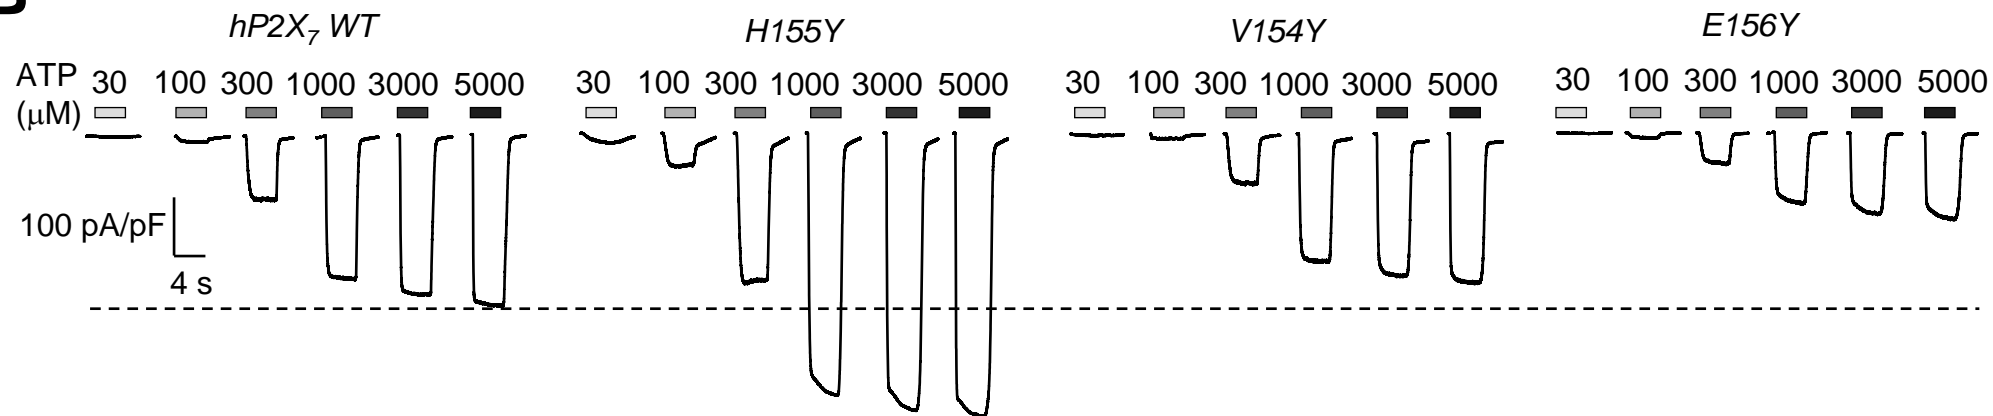

# Supplemental Fig.3C

**C**

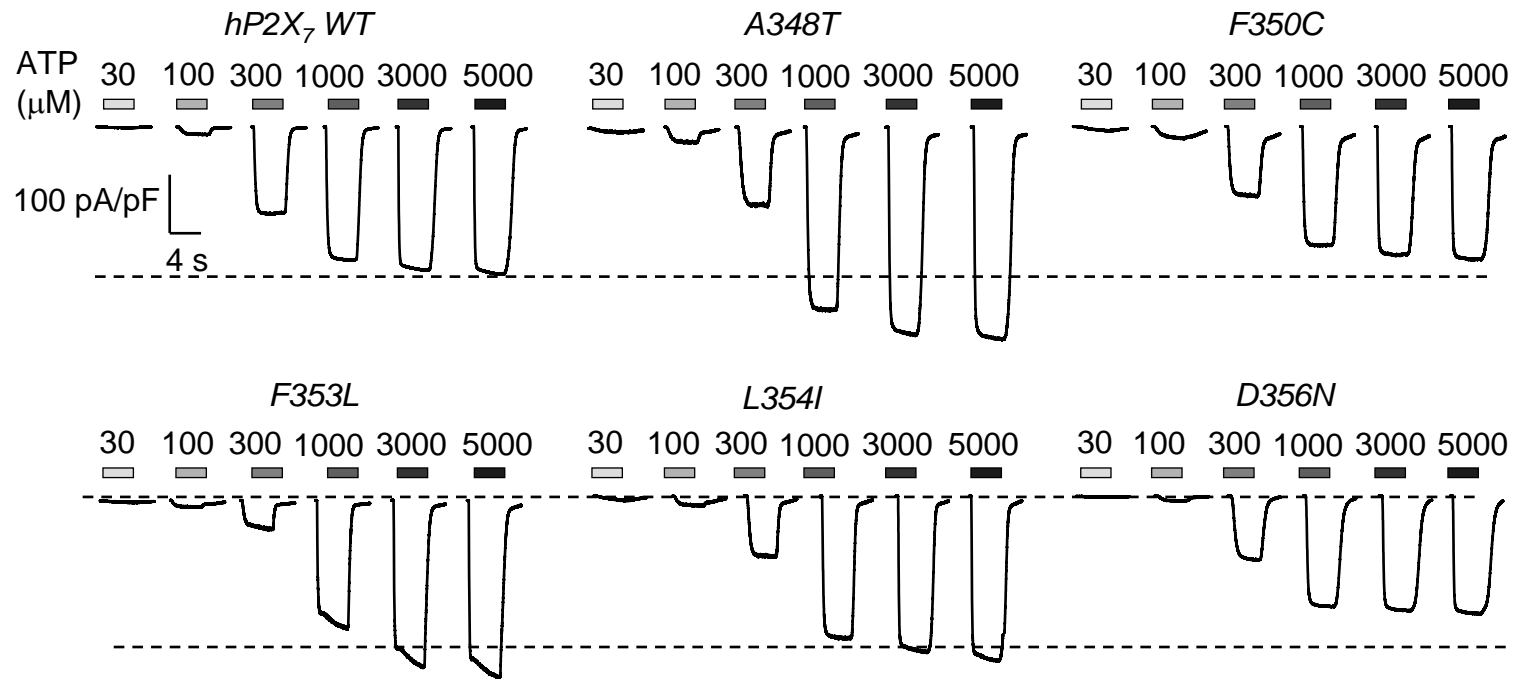

# Supplemental Fig.4

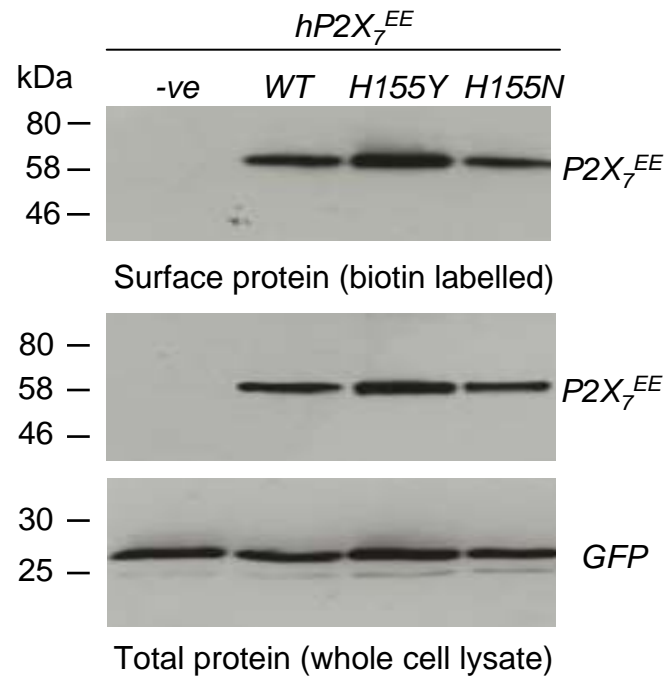



## Supplemental Fig.5

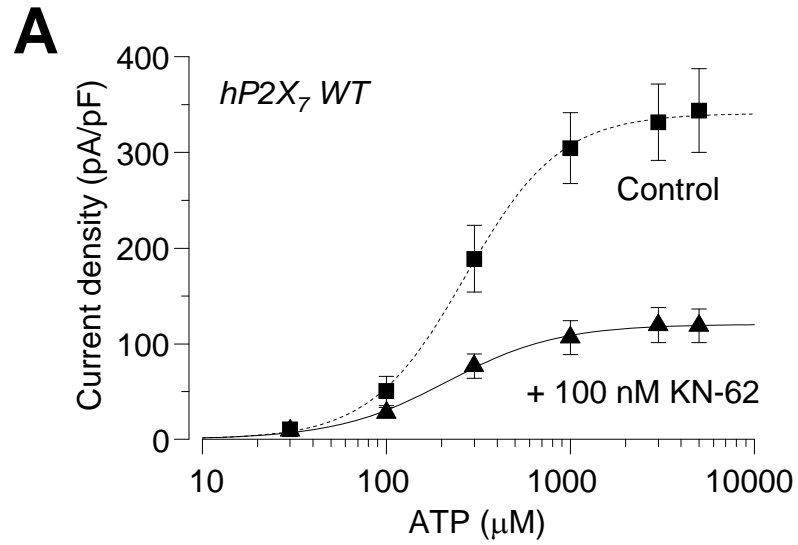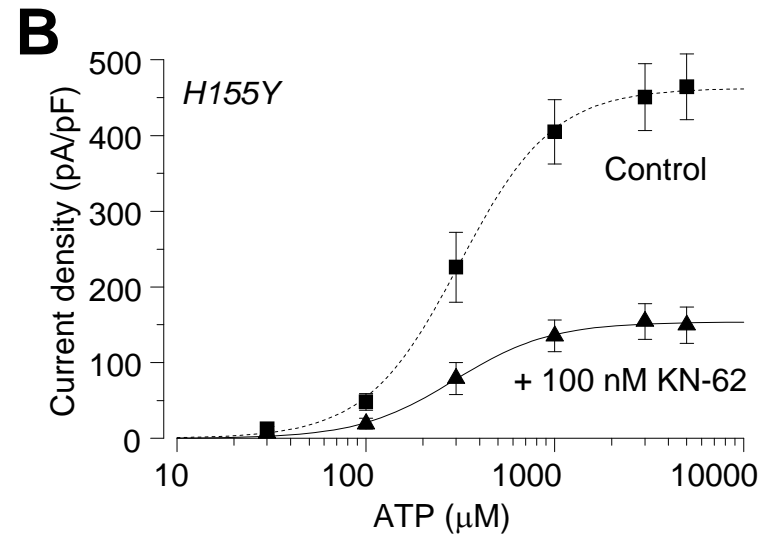

# Supplemental Fig.6

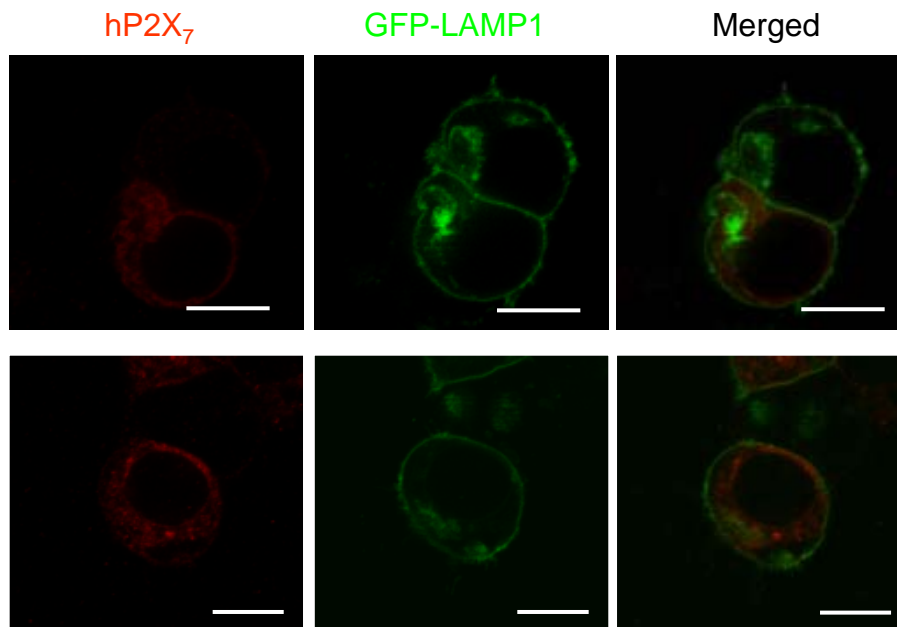

Supplement: supp_M110.211284_jbc.M110.211284-1.pdf [file supp_M110.211284_jbc.M110.211284-1.pdf]
